# Supplementary material for: Investigating the Role of Leukocyte Telomere Length in Treatment-Resistant Depression and in Response to Electroconvulsive Therapy
Source: MDPI journal article supplement (doi:10.3390/jpm11111100), 2021-10-27
Supplement: s1 [file s1]

**Supplementary Table S1.** Comparison of LTL between patients with TRD and controls in a subsample of patients and controls matched for age.

|                           | LTL, median (IQR) | Unadjusted analyses |                    | Analyses adjusted for age |                    |
|---------------------------|-------------------|---------------------|--------------------|---------------------------|--------------------|
|                           |                   | U                   | p                  | Quade's F                 | p                  |
| Patients with TRD (n=147) | 0.77 (0.30)       | <b>5,567</b>        | <b>&lt; 0.0001</b> | <b>58.92</b>              | <b>&lt; 0.0001</b> |
| Controls (n=147)          | 1.03 (0.48)       |                     |                    |                           |                    |
| Patients with MDD (n=121) | 0.79 (0.28)       | <b>4,698</b>        | <b>&lt; 0.0001</b> | <b>47.91</b>              | <b>&lt; 0.0001</b> |
| Controls (n=147)          | 1.03 (0.48)       |                     |                    |                           |                    |
| Patients with BD (n=26)   | 0.70 (0.45)       | <b>869</b>          | <b>&lt; 0.0001</b> | <b>22.81</b>              | <b>&lt; 0.0001</b> |
| Controls (n=147)          | 1.03 (0.48)       |                     |                    |                           |                    |

LTL was compared between a subsample of 147 patients with TRD (median age: 56 years, IQR = 19 years) and 147 controls (median age: 54 years, IQR: 20 years) who were matched based on age using the Case Control Matching function in SPSS v. 26. A tolerance factor of 3 years was applied in order to minimize the loss of cases while still obtaining two groups of cases and controls that did not show a statistically significant difference in age (Mann Whitney's U = 9610, p = 0.10).

**Abbreviations:** IQR, interquartile range; LTL, leukocyte telomere length; TRD, treatment-resistant depression.



**Supplementary Table S2.** Comparison of LTL between responders and non-responders to ECT in patients with TRD stratified based on psychiatric diagnosis.

|                             |                   | Unadjusted analyses |      | Analyses adjusted for age |      |
|-----------------------------|-------------------|---------------------|------|---------------------------|------|
|                             | LTL, median (IQR) | U                   | p    | Quade's F                 | p    |
| <b>Patients with MDD</b>    |                   |                     |      |                           |      |
| Responders at T1 (n=102)    | 0.79 (0.27)       | 598                 | 0.57 | 0.30                      | 0.59 |
| Non-Responders at T1 (n=13) | 0.86 (0.25)       |                     |      |                           |      |
| Responders at T2 (n=59)     | 0.77 (0.31)       | 598                 | 0.17 | 0.94                      | 0.34 |
| Non-Responders at T2 (n=25) | 0.89 (0.24)       |                     |      |                           |      |
| Remitters (n=47)            | 0.75 (0.30)       | 605                 | 0.10 | 1.93                      | 0.17 |
| Non remitters (n=33)        | 0.88 (0.26)       |                     |      |                           |      |
| <b>Patients with BD</b>     |                   |                     |      |                           |      |
| Responders at T1 (n=17)     | 0.65 (0.33)       | 5                   | 0.67 | 0.39                      | 0.54 |
| Non-Responders at T1 (n=1)  | -                 |                     |      |                           |      |
| Responders at T2 (n=6)      | 0.76 (0.44)       | 3                   | 0.43 | 0.47                      | 0.52 |
| Non-Responders at T2 (n=2)  | 0.60 (-)          |                     |      |                           |      |
| Remitters (n=6)             | 0.76 (0.44)       | 3                   | 0.43 | 0.47                      | 0.52 |
| Non remitters (n=2)         | 0.60 (-)          |                     |      |                           |      |
|                             | Median (IQR)      | Spearman's rho      | p    | partial corr. coeff.      | p    |
| <b>Patients with MDD</b>    |                   |                     |      |                           |      |
| Delta % MADRS T1-T0         | 75.00 (21.22)     | -0.13               | 0.15 | -0.15                     | 0.11 |
| Delta % MADRS T2-T0         | 74.08 (55.75)     | -0.19               | 0.09 | -0.18                     | 0.12 |
| <b>Patients with BD</b>     |                   |                     |      |                           |      |
| Delta % MADRS T1-T0         | 79.22 (31.16)     | 0.15                | 0.56 | 0.18                      | 0.50 |
| Delta % MADRS T2-T0         | 94.17 (41.81)     | 0.22                | 0.60 | 0.19                      | 0.69 |

**Abbreviations:** BD, bipolar disorder; corr. coeff, correlation coefficient; IQR, interquartile range; LTL, leukocyte telomere length; MADRS, Montgomery Asberg Depression rating scale; MDD, major depressive disorder.



**Supplementary Table S3.** Comparison of LTL between responders and non-responders to ECT in patients with TRD stratified based on intake of clonazepam.

|                                    |                   | Unadjusted analyses |       | Analyses adjusted for age |      |
|------------------------------------|-------------------|---------------------|-------|---------------------------|------|
|                                    | LTL, median (IQR) | U                   | p     | Quade's F                 | p    |
| <b>Not treated with clonazepam</b> |                   |                     |       |                           |      |
| Responders at T1 (n=91)            | 0.78 (0.30)       | 437                 | 0.49  | 0.28                      | 0.60 |
| Non-Responders at T1 (n=11)        | 0.81 (0.31)       |                     |       |                           |      |
| Responders at T2 (n=55)            | 0.77 (0.36)       | 426                 | 0.38  | 0.72                      | 0.40 |
| Non-Responders at T2 (n=18)        | 0.89 (0.26)       |                     |       |                           |      |
| Remitters at T2 (n=44)             | 0.75 (0.30)       | 423                 | 0.11  | 0.53                      | 0.12 |
| Non remitters at T2 (n=25)         | 0.89 (0.27)       |                     |       |                           |      |
| <b>Treated with clonazepam</b>     |                   |                     |       |                           |      |
| Responders at T1 (n=27)            | 0.75 (0.26)       | 10                  | 0.03  | 0.24                      | 0.14 |
| Non-Responders at T1 (n=3)         | 0.98 (-)          |                     |       |                           |      |
| Responders at T2 (n=10)            | 0.75 (0.32)       | 40                  | 0.72  | 0.05                      | 0.83 |
| Non-Responders at T2 (n=9)         | 0.77 (0.28)       |                     |       |                           |      |
| Remitters at T2 (n= 9)             | 0.75 (0.30)       | 41                  | 0.78  | 0.18                      | 0.68 |
| Non remitters at T2 (n=10)         | 0.76 (0.29)       |                     |       |                           |      |
|                                    | Median (IQR)      | Spearman's rho      | p     | partial corr. coeff.      | p    |
| <b>Not treated with clonazepam</b> |                   |                     |       |                           |      |
| Delta % MADRS T1-T0                | 75.34 (21.74)     | -0.01               | 0.93  | -0.06                     | 0.54 |
| Delta % MADRS T2-T0                | 80.00 (44.58)     |                     |       |                           |      |
| <b>Treated with clonazepam</b>     |                   |                     |       |                           |      |
| Delta % MADRS T1-T0                | 75.53 (24.31)     | -0.36               | 0.048 | -0.23                     | 0.23 |
| Delta % MADRS T2-T0                | 73.53 (80.29)     |                     |       |                           |      |

**Abbreviations:** corr. coeff, correlation coefficient; IQR, interquartile range; LTL, leukocyte telomere length; MADRS, Montgomery Asberg Depression rating scale.



**Supplementary Table S4.** Assessment of overrepresentation between SNPs and genes associated with response to ECT and LTL.

| Number of SNPs nominally associated with LTL  | Number of SNPs nominally associated with response  | Overlap between SNPs associated with LTL and response  | p        |
|-----------------------------------------------|----------------------------------------------------|--------------------------------------------------------|----------|
| SNP associated with LTL: 185,410              | SNPs associated with response at T1: 128,228       | 6,021                                                  | p = 1    |
|                                               | SNPs associated with response at T2: 144,770       | 6,222                                                  | p = 1    |
|                                               | SNPs associated with remission: 145,795            | 6,803                                                  | p = 1    |
|                                               | SNPs associated with Delta % T0-T1: 179,239        | 8,312                                                  | p = 1    |
|                                               | SNPs associated with Delta % T0-T2: 177,725        | 8,134                                                  | p = 1    |
| Number of genes nominally associated with LTL | Number of genes nominally associated with response | Overlap between genes associated with LTL and response | p        |
| Genes associated with LTL: 885                | Genes associated with response at T1: 608          | 39                                                     | p = 0.11 |
|                                               | Genes associated with response at T2: 651          | 26                                                     | p = 0.93 |
|                                               | Genes associated with remission: 602               | 26                                                     | p = 0.85 |
|                                               | Genes associated with Delta % T0-T1: 849           | 45                                                     | p = 0.44 |
|                                               | Genes associated with Delta % T0-T2: 810           | 48                                                     | p = 0.17 |

**Abbreviations:** LTL, leukocyte telomere length; SNP, single nucleotide polymorphism.



**Supplementary Table S5.** Association between SNP previously associated with LTL and response to ECT.

|     |            |               | Response at T1 |      |      | Delta % T0-T1 |       | Response at T2 |       | Remission |      | Delta % T0-T2 |      | LTL in current sample |      |
|-----|------------|---------------|----------------|------|------|---------------|-------|----------------|-------|-----------|------|---------------|------|-----------------------|------|
| Chr | SNP        | Closest gene  | A1             | OR   | P    | Beta          | P     | OR             | P     | OR        | P    | Beta          | P    | Beta                  | P    |
| 1   | rs3219104  | PARP1         | A              | 0.95 | 0.93 | 0.80          | 0.81  | 0.64           | 0.33  | 0.78      | 0.58 | -7.37         | 0.33 | -0.03                 | 0.41 |
| 3   | rs2613954  | RP11-572M11.4 | C              | 1.26 | 0.72 | 2.97          | 0.35  | 2.47           | 0.10  | 1.48      | 0.38 | 12.70         | 0.09 | -0.02                 | 0.60 |
| 3   | rs10936600 | LRRC34 (TERC) | T              | 0.55 | 0.21 | -0.29         | 0.91  | 0.69           | 0.33  | 0.65      | 0.26 | -2.64         | 0.69 | 0.00                  | 0.94 |
| 4   | rs60160057 | DCLK2         | A              | 2.33 | 0.26 | 3.80          | 0.18  | 0.41           | 0.045 | 0.42      | 0.06 | -16.63        | 0.02 | 0.00                  | 0.94 |
| 4   | rs4691895  | NAF1          | G              | 0.76 | 0.63 | 0.40          | 0.90  | 2.20           | 0.12  | 1.34      | 0.51 | -0.90         | 0.90 | -0.02                 | 0.68 |
| 5   | rs2853677  | TERT          | G              | 1.20 | 0.71 | -3.55         | 0.15  | 1.38           | 0.37  | 1.72      | 0.13 | 4.87          | 0.38 | -0.01                 | 0.61 |
| 6   | rs2736176  | PRRC2A        | C              | 1.22 | 0.69 | 0.32          | 0.90  | 0.53           | 0.11  | 0.84      | 0.64 | -9.44         | 0.12 | -0.01                 | 0.86 |
| 7   | rs59294613 | POT1          | A              | 1.15 | 0.76 | 2.70          | 0.26  | 1.11           | 0.77  | 1.25      | 0.51 | 3.61          | 0.50 | -0.02                 | 0.47 |
| 8   | rs57415150 | CSMD1         | A              | 1.00 | 1.00 | -5.07         | 0.39  | 0.92           | 0.92  | 1.53      | 0.64 | -4.57         | 0.75 | 0.00                  | 0.97 |
| 10  | rs9419958  | STN1 (OBFC1)  | T              | 0.47 | 0.13 | -4.60         | 0.14  | 1.38           | 0.52  | 1.20      | 0.69 | 4.37          | 0.54 | -0.06                 | 0.08 |
| 11  | rs228595   | ATM           | G              | 1.79 | 0.23 | 2.36          | 0.33  | 0.78           | 0.49  | 0.82      | 0.56 | -2.28         | 0.69 | 0.05                  | 0.11 |
| 12  | rs7311314  | SMUG1         | A              | 3.45 | 0.06 | -0.16         | 0.95  | 1.41           | 0.39  | 1.67      | 0.18 | 4.41          | 0.46 | 0.01                  | 0.74 |
| 14  | rs2302588  | DCAF4         | C              | 0.59 | 0.36 | -6.87         | 0.05  | 1.28           | 0.64  | 1.09      | 0.86 | -1.56         | 0.85 | 0.03                  | 0.49 |
| 15  | rs12909131 | ATP8B4        | T              | 0.61 | 0.38 | -1.38         | 0.68  | 0.79           | 0.60  | 0.88      | 0.78 | -7.73         | 0.30 | 0.00                  | 0.92 |
| 16  | rs3785074  | TERF2         | G              | 0.60 | 0.31 | -4.29         | 0.13  | 1.26           | 0.60  | 0.95      | 0.90 | 1.35          | 0.84 | 0.00                  | 0.92 |
| 16  | rs7194734  | MPHOSPH6      | C              | 1.36 | 0.58 | 4.23          | 0.12  | 0.39           | 0.032 | 0.72      | 0.42 | -13.05        | 0.05 | 0.07                  | 0.04 |
| 18  | rs2124616  | TYMS          | A              | 1.03 | 0.97 | 3.43          | 0.44  | 0.59           | 0.42  | 0.74      | 0.64 | -2.49         | 0.82 | 0.01                  | 0.88 |
| 19  | rs8105767  | ZNF208        | G              | 0.44 | 0.07 | -7.19         | 0.003 | 0.73           | 0.41  | 0.49      | 0.07 | -11.26        | 0.07 | 0.01                  | 0.78 |
| 20  | rs75691080 | STMN3         | T              | 1.39 | 0.69 | 0.60          | 0.88  | 2.00           | 0.27  | 3.37      | 0.05 | 13.68         | 0.13 | 0.01                  | 0.76 |
| 20  | rs932827   | ZBTB46        | T              | 0.85 | 0.76 | 2.30          | 0.43  | 0.72           | 0.46  | 0.60      | 0.25 | -0.79         | 0.91 | -0.04                 | 0.29 |
| 20  | rs73624724 | ZBTB46        | C              | NA   | NA   | 0.99          | 0.86  | 0.29           | 0.09  | 0.32      | 0.13 | -19.26        | 0.12 | 0.07                  | 0.31 |

**Abbreviations:** A1, effect allele; Chr, chromosome; LTL, leukocyte telomere length; NA, not available, OR, odds ratio; SNP, single nucleotide polymorphism.
